# Supplementary material for: Antibody-mediated enhancement aggravates chikungunya virus infection and disease severity
Source: PubMed Central journal article supplement (PMC5789897; doi:10.1038/s41598-018-20305-4), 2018-01-30
Supplement: 41598_2018_20305_MOESM1_ESM.pdf [file 41598_2018_20305_MOESM1_ESM.pdf]

1 **Scientific Reports**

2 **Supplemental Materials**

3

4 **Antibody-mediated enhancement aggravates chikungunya virus**  
5 **infection and disease severity**

6

7 Fok-Moon Lum<sup>1,2\*</sup>, Thérèse Couderc<sup>3,4</sup>, Bing-Shao Chia<sup>1,#a</sup>, Ruo-Yan Ong<sup>1,#b</sup>,  
8 Zhisheng Her<sup>1,#c</sup>, Angela Chow<sup>5</sup>, Yee-Sin Leo<sup>5</sup>, Yiu-Wing Kam<sup>1</sup>, Laurent  
9 Rénia<sup>1</sup>, Marc Lecuit<sup>3,4,6</sup> and Lisa F.P. Ng<sup>1,2,7\*</sup>

10

11 <sup>1</sup>Singapore Immunology Network, Agency for Science, Technology and  
12 Research (A\*STAR), Singapore 138648, Singapore

13 <sup>2</sup>Department of Biochemistry, Yong Loo Lin School of Medicine, National  
14 University of Singapore (NUS), Singapore 117596, Singapore

15 <sup>3</sup>Biology of Infection Unit, Institut Pasteur, Paris 75015, France

16 <sup>4</sup>Inserm U1117, Paris 75015, France

17 <sup>5</sup>Institute of Infectious Disease and Epidemiology, Tan Tock Seng Hospital,  
18 Singapore 308433, Singapore

19 <sup>6</sup>Paris Descartes University, Sorbonne Paris Cité, Institut Imagine, Necker-  
20 Enfants Malades University Hospital, Division of Infectious Diseases and  
21 Tropical Medicine, APHP, Paris 75743 France

22 <sup>7</sup>Institute of Infection and Global Health, University of Liverpool, Liverpool L69  
23 7BE, United Kingdom

24 <sup>#a</sup>Department of Microbiology and Immunobiology, Harvard Medical School,  
25 Boston, Massachusetts 02115, United States

26 #<sup>b</sup>School of Life Sciences, University of Dundee, Dundee DD1 5EH , United  
27 Kingdom  
28 #<sup>c</sup>Institute of Molecular and Cell Biology, Agency for Science, Technology and  
29 Research (A\*STAR), Singapore

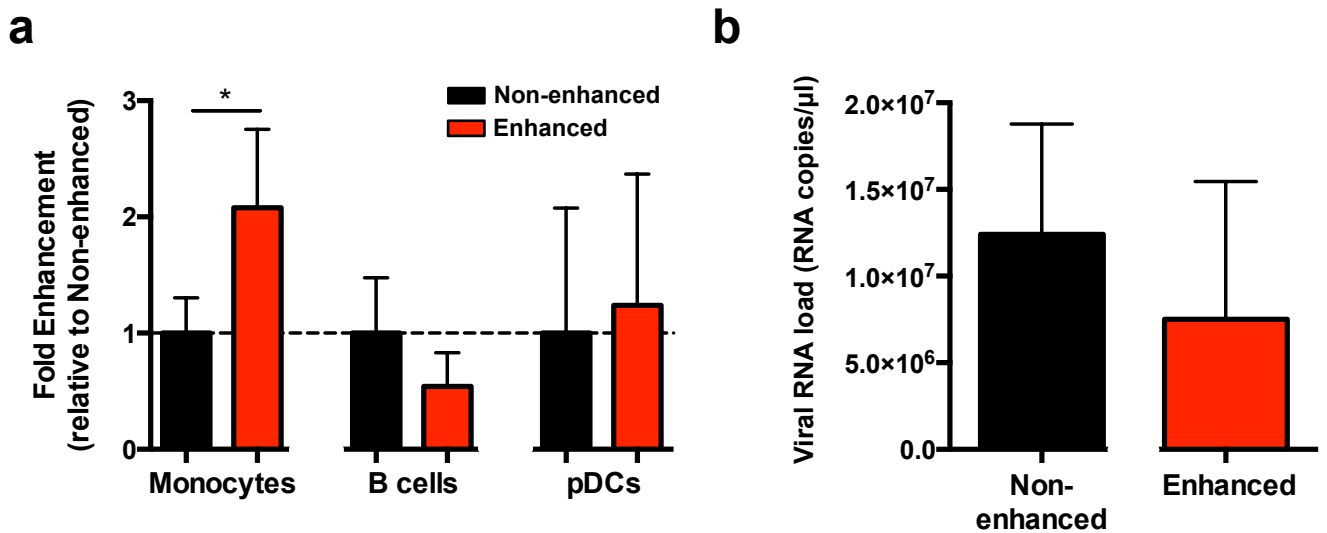

**Figure S1: Enhanced CHIKV infection in human whole blood.** Human whole blood was infected with Zs-Green tagged CHIKV ( $2 \times 10^7$  PFU) either in the presence (enhanced) or absence (non-enhanced) of diluted CHIKV patient plasma containing total IgG at a concentration of  $1.8 \pm 1.45 \mu\text{g/ml}$ . (a) Level of infection and (b) viral RNA load were determined 24 hours post-infection (hpi). Level of CHIKV infection was determined by the amount of Zs-Green positive cells and is expressed as fold enhancement relative to the non-enhanced infection controls. Data shown are mean  $\pm$  SD from 5 independent donors by Mann-Whitney  $U$  test ( $*P = 0.0115$ ).

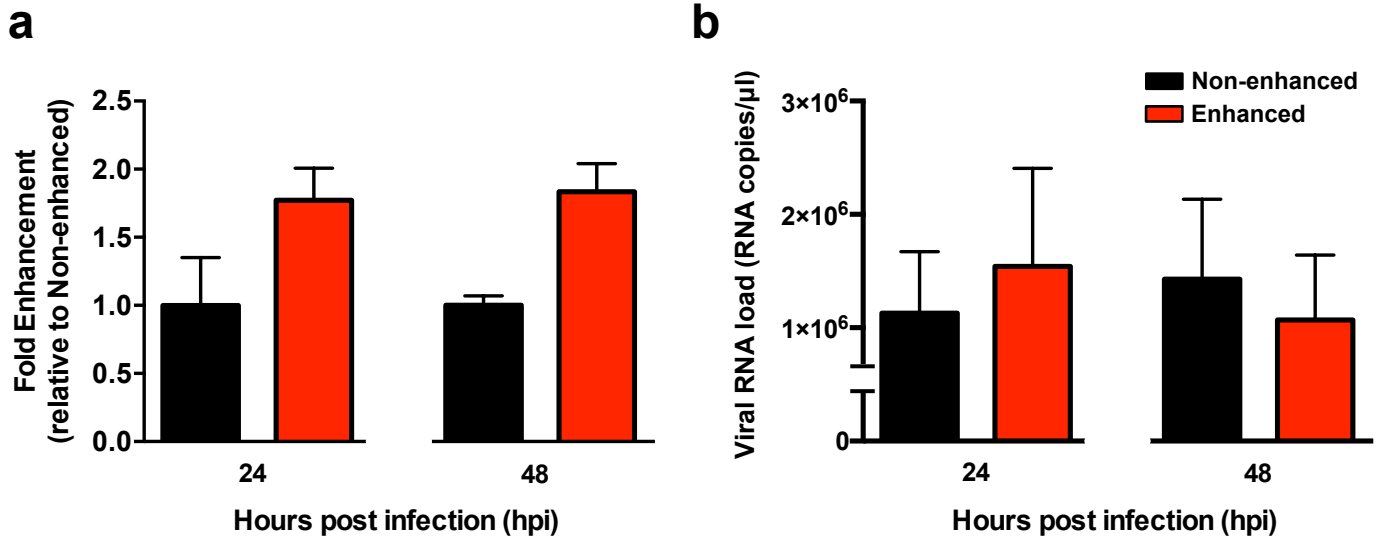

**Figure S2: CHIKV infection enhancement in primary human monocytes.** Isolated primary human monocytes ( $2 \times 10^6$  cells) were infected with Zs-Green tagged CHIKV (moi 10) either in the presence (enhanced) or absence (non-enhanced) of diluted CHIKV patient plasma containing total IgG at a concentration of  $3.6 \pm 2.9 \mu\text{g/ml}$ . (a) Level of infection and (b) viral RNA load were determined at 24 and 48 hpi. Level of CHIKV infection was determined by the amount of Zs-Green positive cells and is expressed as fold enhancement relative to the non-enhanced infection controls. Data shown are mean  $\pm$  SD from 4 independent experiments.

**a**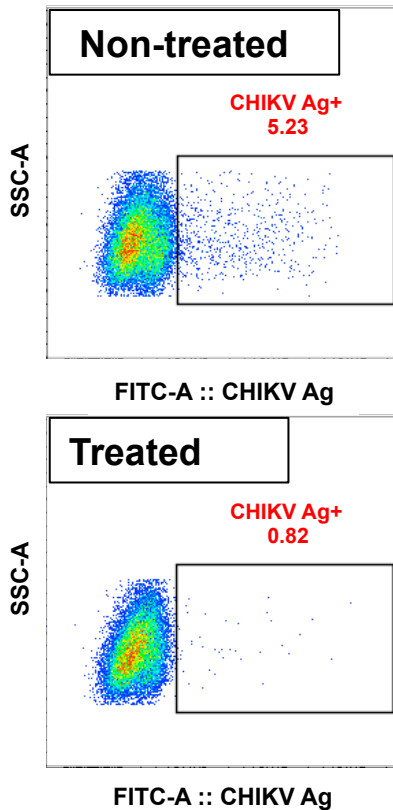**b**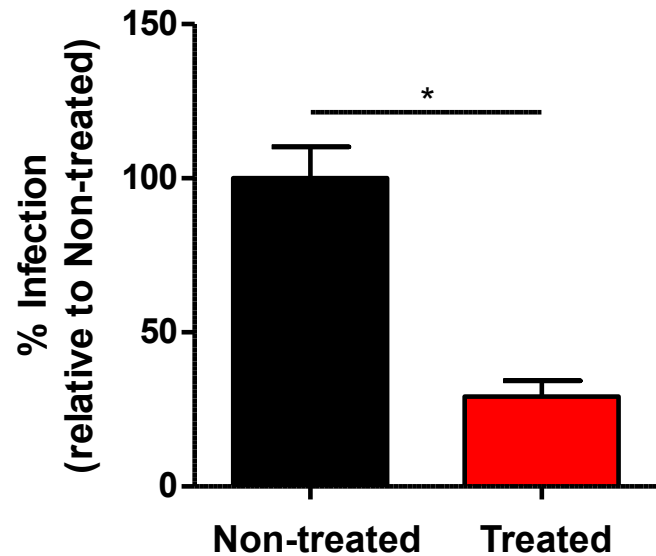

**Figure S3: Enhanced CHIKV infection in human monocytes-derived macrophages (MDMs) is mediated by FcγRII.** MDMs ( $2 \times 10^6$  cells) were treated with  $10 \mu\text{g}$  of FcγRII blocking antibody prior to infection with Zs-Green tagged CHIKV (moi 10) in the presence of CHIKV patient plasma containing total IgG at a concentration of  $1.8 \pm 1.45 \mu\text{g/ml}$ . (a) FACS plot showing the decrease in the amount of CHIKV antigen detected from one representative experiment at 24 hours post-infection (hpi). (b) Percentage of infection is expressed as level of CHIKV antigen detected relative to the non-treated-enhanced infection controls. Data are presented as mean  $\pm$  SD from 4 independent experiments by Mann-Whitney  $U$  test ( $*P = 0.0143$ ).

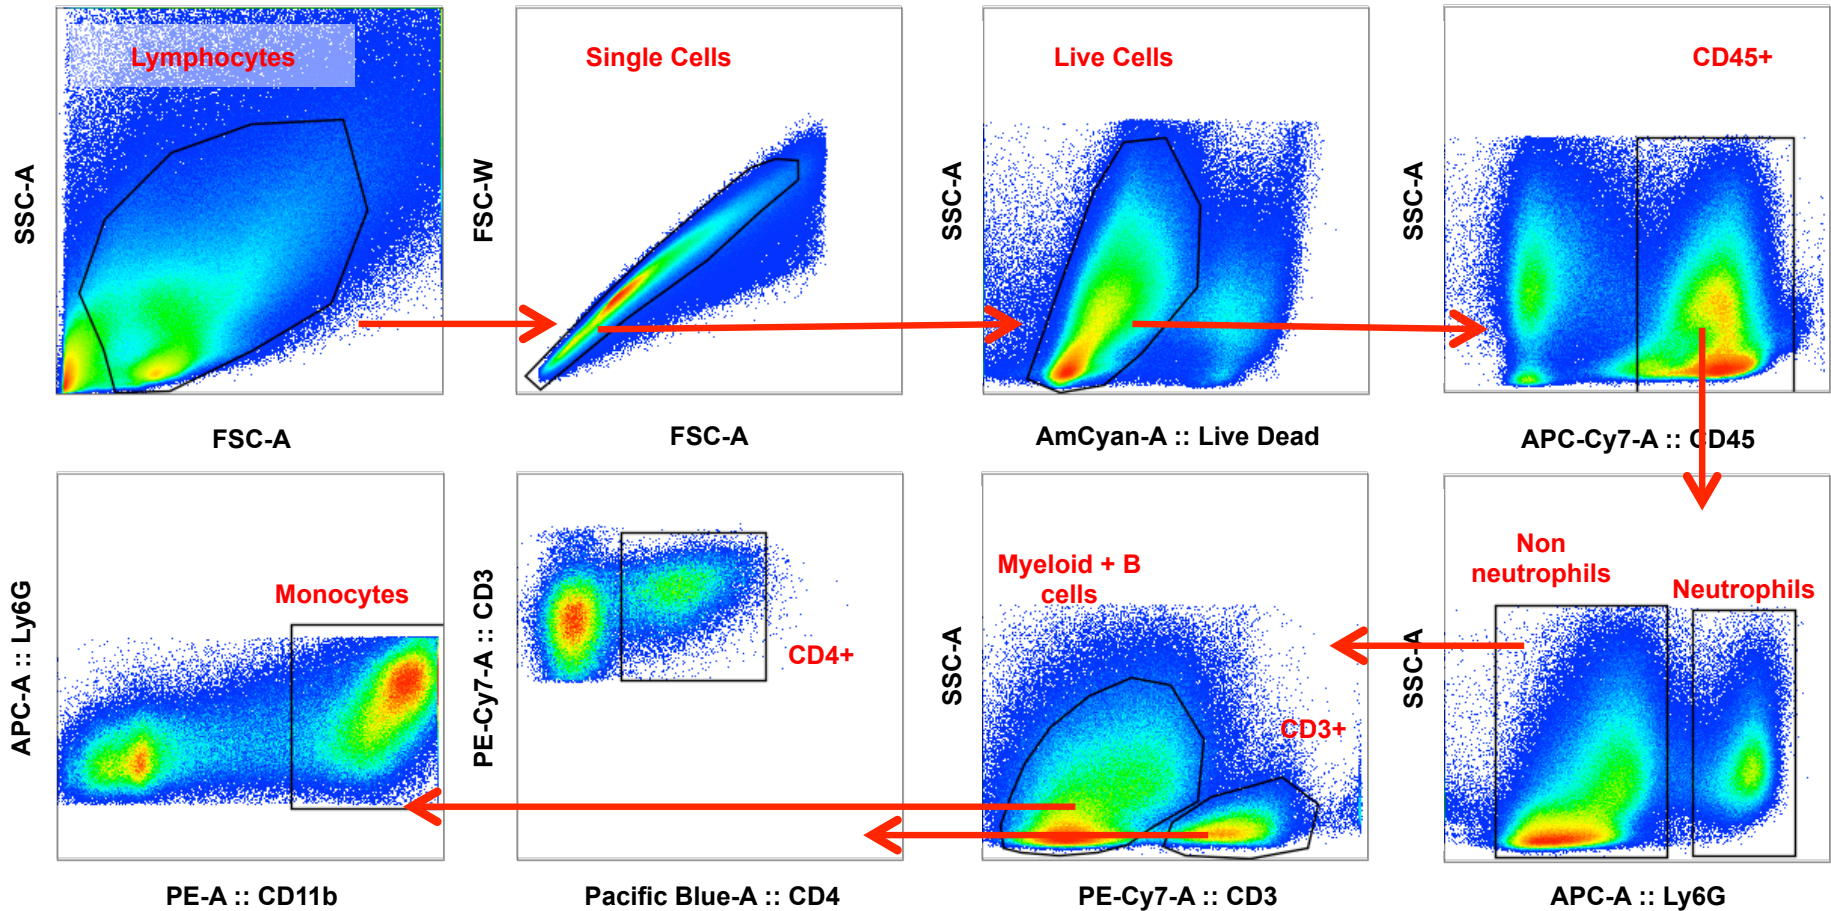

**Figure S4: Immunophenotyping of CHIKV infected WT mice.** Three-weeks old, C57BL/6 WT female mice were infected via footpad inoculation with  $10^6$  PFU of CHIKV. Immediately, these mice were administered intraperitoneally with  $\sim 2\mu\text{g/ml}$  sera from CHIKV-infected mice (enhanced) or PBS (non-enhanced). Gating strategy of immune-phenotyping illustrated using samples extracted from the CHIKV-infected footpad is shown here. Strategy described is used for all analyzes.

**a**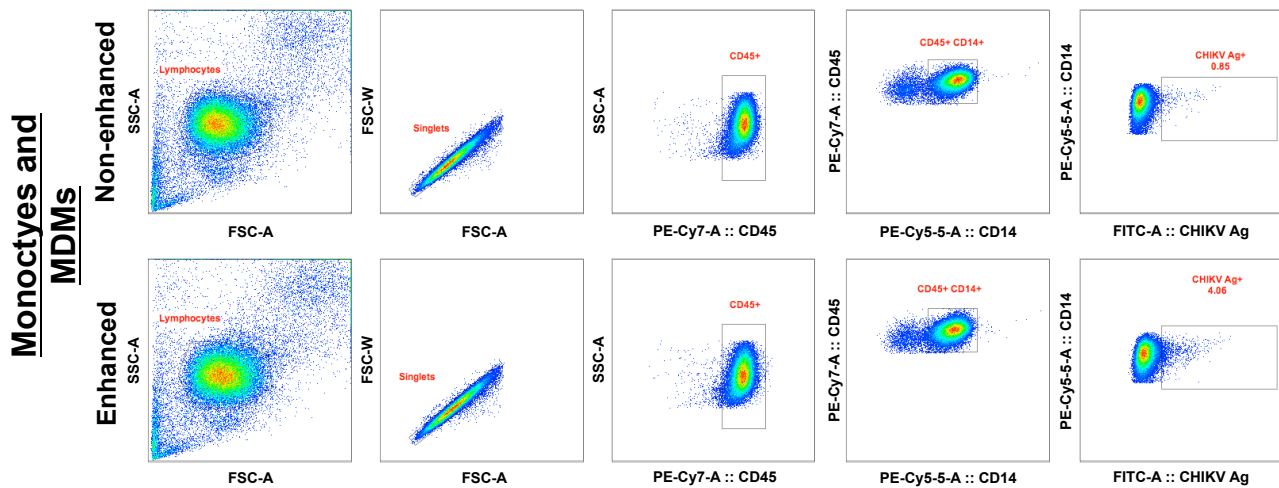**b**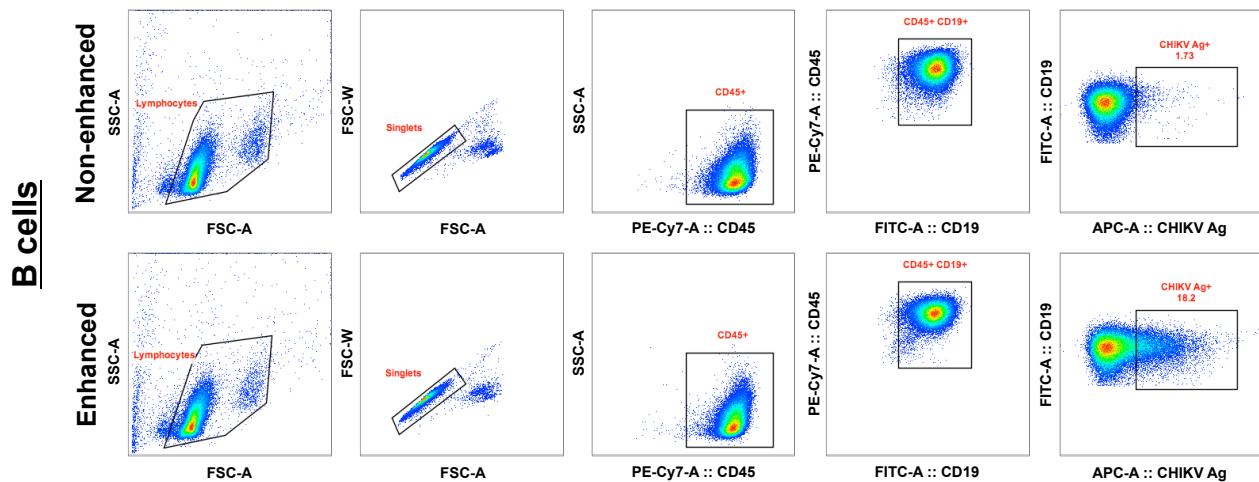

**Figure S5: Gating strategy in determining CHIKV infection in infected primary human cells.** Cells were first gated based on their forward and side scatter. Subsequently doublets were excluded from the analysis. Isolated primary cells were then gated based on their specific markers before percentage of CHIKV positive cells were determined from these cells. Illustration is shown using isolated primary human (a) monocytes and (b) B cells from one experiment. Strategy used in (a) was also applied for human monocytes-derived macrophages. Strategy described was used for all replicates of related experiments.

**Table S1. Sequences of primers used for gene expression studies**

| <b>Genes</b> | <b>Primers sequences<sup>a</sup></b> |                                |
|--------------|--------------------------------------|--------------------------------|
| IL-6         | Forward                              | TTCCATCCAGTTGCCTTCTTG          |
|              | Reverse                              | TTGGGAGTGGTATCCTCTGTGA         |
| iNOS         | Forward                              | CTGCTCACTCAGCCAGGCCCTCACCTACTT |
|              | Reverse                              | TGATCCCGGGAGGAGCTGATGGAGTAGAAC |
| SOCS3        | Forward                              | ATGGTCACCCACAGCAAGTTT          |
|              | Reverse                              | TCCAGTAGAATCCGCTCTCCT          |
| IFN $\alpha$ | Forward                              | GTGACAGGGAAGCTTAGGGAGC         |
|              | Reverse                              | AGAGTGGGGTGTCTGCCTTA           |
| IFN $\beta$  | Forward                              | AACTTTGACATCCCTGAGGAGATTAAGCAG |
|              | Reverse                              | GACTATGGTCCAGGCACAGTGACTGTACTC |
| IFN $\gamma$ | Forward                              | ATCTGGAGGAACTGGCAAAA           |
|              | Reverse                              | TGAGCTCATTGAATGCTTGG           |
| IRF3         | Forward                              | GGGGAGCCTCTTGACTGAAAACCGTGGA   |
|              | Reverse                              | TAACCACCAGCCTAGACGCAGTCGACAGCA |
| IRF9         | Forward                              | GCCGAGTGGTGGGTAAGAC            |
|              | Reverse                              | GCAAAGGCGCTGAACAAAGAG          |
| STAT1        | Forward                              | GCTGGGCGTCTATCCTGTGGT          |
|              | Reverse                              | GCTCAGCTGGTCTGCGTTCA           |
| STAT2        | Forward                              | TCCTGCCAATGGACGTTTCG           |
|              | Reverse                              | GTCCCACTGGTTCAGTTGGT           |
| STAT3        | Forward                              | CAATACCATTGACCTGCCGAT          |
|              | Reverse                              | GAGCGACTCAAAGTCCCT             |
| STAT5        | Forward                              | CGATGCCCTTCACCAGATG            |
|              | Reverse                              | AGCTGGGTGGCCTTAATGTTC          |
| STAT6        | Forward                              | CGCTGATAAGCCGTCTGGAT           |
|              | Reverse                              | TGTGTCTTCAGAACCTGCGG           |
| Viperin      | Forward                              | CTTCAACGTGGACGAAGACA           |
|              | Reverse                              | GACGCTCCAAGAATGTTTCA           |
| ISG15        | Forward                              | TGGGACCTAAAGGTGAAGATGCTG       |
|              | Reverse                              | TCAGGCGCAAATGCTTGATCAC         |
| DEF14        | Forward                              | TCCAGGGGACGCATTCCTA            |
|              | Reverse                              | ACCGCTATTAGAACATCGACCTA        |
| mIL-10       | Forward                              | TGGCCTTGTAGACACCTTGG           |
|              | Reverse                              | AGCTGAAGACCCTCAGGATG           |
| GAPDH        | Forward                              | TCGTCCCGTAGACAAAATGG           |
|              | Reverse                              | TTGAGGTCAATGAAGGGGTC           |

<sup>a</sup> Primers sequences shown are of mouse origin
